# Supplementary material for: Dental Insurance Coverage, Dentist Visiting, and Oral Health Status among Asian Immigrant Women of Childbearing Age in Canada: A Comparative Study
Source: MDPI journal article supplement (doi:10.3390/healthcare11192666), 2023-10-01
Supplement: s1 [file s1]

**Table S1: Questions and options in the questionnaire regarding self-perceived dental health status, dental symptoms during the last month, teeth removed due to decay in the past 12-months, the last time the participant visited the dentist, and the frequency of dentist visits.**

| Questionnaire from CCHS                                                                                                                                                                                                                                                                                                               | Answers                                                                                          | Categorized outcomes                                     |
|---------------------------------------------------------------------------------------------------------------------------------------------------------------------------------------------------------------------------------------------------------------------------------------------------------------------------------------|--------------------------------------------------------------------------------------------------|----------------------------------------------------------|
| “In general, would you say the health of your teeth and mouth?”                                                                                                                                                                                                                                                                       | “Excellent” or “Very good” or “Good”                                                             | good oral health status                                  |
|                                                                                                                                                                                                                                                                                                                                       | “Fair” or “Poor”                                                                                 | poor oral health status                                  |
| “In the past month, have you had: a toothache?” or “In the past month, were your teeth: sensitive to hot or cold food or drinks?” or “In the past month, have you had: pain in or around the jaw joints?” or “In the past month, have you had: other pain in the mouth or face?” or “In the past month, have you had: bleeding gums?” | Either question was answered “yes” by a respondent                                               | Had dental symptoms during past one month                |
|                                                                                                                                                                                                                                                                                                                                       | All questions were answered “No” by a respondent                                                 | Do not had dental symptoms during past one month         |
| “In the past 12 months, have you had any teeth removed by a dentist?”                                                                                                                                                                                                                                                                 | “Yes”                                                                                            | Had teeth removed due to decay in past one year          |
|                                                                                                                                                                                                                                                                                                                                       | “No”                                                                                             | Did not have teeth removed due to decay in past one year |
| “When was the last time that you went to a dentist?”                                                                                                                                                                                                                                                                                  | “Less than 1 year ago” or “1 year to less than 2 years ago” or “1 year to less than 3 years ago” | Visiting dentist within the last 3 years (Yes)           |
|                                                                                                                                                                                                                                                                                                                                       | “3 year to less than 4 years ago” or “4 year to less than 5 years ago” or “5 or more years ago”  | Visiting dentist within the last 3 years (No)            |
| “Do you usually visit dentist”                                                                                                                                                                                                                                                                                                        | “More than once a year for check-ups” or “about once a year for check-ups”                       | Visiting dentist more than once per year (Yes)           |
|                                                                                                                                                                                                                                                                                                                                       | “Less than once a year for check-ups” or “only for emergency care”                               | Visiting dentist more than once per year (No)            |

**Table S2: Rates of dental insurance coverage in women aged 20-39 years, by immigrant status.**

|                                         | Canadian born<br>residences<br>(n= 4066)<br>(%)#† | Non-Asian<br>immigrants<br>(n= 763)<br>(%)# | Asian<br>immigrants<br>(n= 908)<br>(%)# | Recent Asian<br>immigrants<br>(n= 522)<br>(%)# | Long-term Asian<br>immigrants<br>(n= 386)<br>(%)# |
|-----------------------------------------|---------------------------------------------------|---------------------------------------------|-----------------------------------------|------------------------------------------------|---------------------------------------------------|
| Dental insurance coverage               |                                                   |                                             |                                         |                                                |                                                   |
|                                         |                                                   | <i>P</i> <0.01 **                           | <i>P</i> <0.01 **                       | <i>P</i> <0.01 **                              |                                                   |
| Yes                                     | 73.77                                             | 62.94                                       | 58.62                                   | 51.45                                          | 68.33                                             |
| no                                      | 26.23                                             | 37.02                                       | 41.38                                   | 48.55                                          | 31.67                                             |
| Persons who<br>have dental<br>insurance | Canadian born<br>residences<br>(n= 3000)<br>(%)#† | Non-Asian<br>immigrants<br>(n= 480)<br>(%)# | Asian<br>immigrants<br>(n=532)<br>(%)#  | Recent Asian<br>immigrants<br>(n=268)<br>(%)#  | Long term Asian<br>immigrants<br>(n= 264)<br>(%)# |
| Employer-sponsored dental insurance     |                                                   |                                             |                                         |                                                |                                                   |
|                                         |                                                   |                                             |                                         |                                                | <i>P</i> <0.05 *                                  |
| Yes                                     | 83.45                                             | 80.66                                       | 83.81                                   | 77.26                                          | 90.47                                             |
| No/ Other‡                              | 16.55                                             | 19.34                                       | 16.19                                   | 21.96 <sup>E</sup>                             | 9.19 <sup>E</sup>                                 |

Data source: Canadian Community Healthy Survey annual data 2011, 2012, 2013, 2014  
(%) # All percentages are probability weighted

n=weighted sample size

\*Significant different from Canadian born residences ( $p<0.05$ ), using bootstrap

\*\*Highly significant different from Canadian born residences ( $p<0.01$ ), using bootstrap

E Coefficient of variation between 16.6% and 33.3%. Estimates are considered marginal and associated with high sampling variability.

‡Others included don't know/ refusal/not stated

**Table S3: Rate of last time visiting dentist and dentist visiting behavior per year in women aged 20-39, by immigrant status.**

|                                          | Canadian<br>born female<br>residences<br>(n= 4066)<br>(%)#† | Non-Asian<br>female<br>immigrants<br>(n=763)<br>(%)# | Asian<br>female<br>immigrant<br>(n=908)<br>(%)# | Recent Asian<br>female<br>immigrant<br>(n=522)<br>(%)# | Long-term Asian<br>female<br>immigrant<br>(n=386)<br>(%)# |
|------------------------------------------|-------------------------------------------------------------|------------------------------------------------------|-------------------------------------------------|--------------------------------------------------------|-----------------------------------------------------------|
| Visiting dentist within the last 3 years |                                                             |                                                      |                                                 |                                                        |                                                           |
|                                          |                                                             | <i>P</i> <0.01**                                     | <i>P</i> <0.01**                                | <i>P</i> <0.05*                                        |                                                           |
| Yes                                      | 91.87                                                       | 86.49                                                | 86.16                                           | 85.16                                                  | 87.51                                                     |
| No and others‡                           | 8.13                                                        | 13.51 <sup>E</sup>                                   | 13.84 <sup>E</sup>                              | 14.84 <sup>E</sup>                                     | 12.49 <sup>F</sup>                                        |
| Visiting dentist more than once per year |                                                             |                                                      |                                                 |                                                        |                                                           |
|                                          |                                                             | <i>P</i> <0.01**                                     | <i>P</i> <0.01**                                | <i>P</i> <0.01**                                       |                                                           |
| Yes                                      | 77.67                                                       | 66.31                                                | 59.38                                           | 51.19                                                  | 70.46                                                     |
| No                                       | 22.33                                                       | 33.69                                                | 40.62                                           | 48.81                                                  | 29.54 <sup>E</sup>                                        |

Data source: Canadian Community Healthy Survey annual data 2011,2012,2013,2014

(%) # All percentages are probability weighted

n=weighted sample size

†Reference group

\*Significant different from Canadian born residences (*p*<0.05), using bootstrap

\*\*Highly significant different from Canadian born residences (*p*<0.01), using bootstrap

<sup>E</sup> Coefficient of variation between 16.6% and 33.3%. Estimates are considered marginal and associated with high sampling variability.

<sup>F</sup> Coefficient of variation greater than 33.3%, estimate suppressed

‡Included don't know/ refusal/not stated

**Table S4: Prevalence of self-perceived dental health, dental symptoms, and teeth loss of women aged 20-39, by immigrant status.**

|                                             | Canadian born<br>residences†<br>(n= 4066)<br>(%)#† | Non-Asian<br>immigrants<br>(n= 763)<br>(%)# | Asian<br>immigrants<br>(n= 908)<br>(%)# | Recent Asian<br>immigrants<br>(n=522)<br>(%)# | Long-term Asian<br>immigrants<br>(n=386)<br>(%)# |
|---------------------------------------------|----------------------------------------------------|---------------------------------------------|-----------------------------------------|-----------------------------------------------|--------------------------------------------------|
| Self-perceived health                       |                                                    |                                             |                                         |                                               |                                                  |
| Excellent/very good/good                    | 89.41                                              | 85.43                                       | 86.54                                   | 86.55                                         | 86.53                                            |
| Fair & poor                                 | 10.59                                              | 14.57 <sup>E</sup>                          | 13.46 <sup>E</sup>                      | 13.45 <sup>E</sup>                            | 13.47 <sup>E</sup>                               |
| Teeth removed due to decay in past one year |                                                    |                                             | <i>P</i> <0.01**                        |                                               |                                                  |
| Yes                                         | 2.12                                               | 3.40                                        | 6.08 <sup>E</sup>                       | -                                             | -                                                |
| No/not visit dentist                        | 97.88                                              | 96.60                                       | 93.92                                   | -                                             | -                                                |
| Dental symptoms in past month               |                                                    |                                             | <i>P</i> <0.01**                        | <i>P</i> <0.05*                               | <i>P</i> <0.05*                                  |
| Yes <sup>&amp;</sup>                        | 53.42                                              | 49.21                                       | 42.96                                   | 42.78                                         | 43.20                                            |
| No/ Other‡                                  | 46.58                                              | 50.79                                       | 57.04                                   | 57.22                                         | 56.80                                            |

Data source: Combined Canadian Community Healthy Survey annual data of 2011, 2012, 2013, and 2014.

(%) #All percentages are probability weighted.

†Reference group.

\*Significantly different from Canadian born residences (*p*<0.05), using bootstrap

\*\*Highly significant different from Canadian born residences (*p*<0.01), using bootstrap

- Not applicable due to the low number of subjects deemed confidential, which was not disclosed by the Research Data Center

<sup>E</sup> Coefficient of variation between 16.6% and 33.3%. Estimates are considered marginal and associated with high sampling variability.

<sup>&</sup> Include had a toothache, teeth sensitive to hot or cold, pain in jaw joints, pain in mouth or face, bleeding gum. Responses are not mutually exclusive.
